# Supplementary material for: High-sensitivity plasma proteomics reveals disease-specific signatures and predictive biomarkers of Alzheimer’s disease phenotypes in a large mixed dementia cohort
Source: Research Square preprint supplement (doi:10.21203/rs.3.rs-6440485/v1), 2025-06-29
Supplement: Supplementary file 2 [file d334aace5c6fcf643e798634.xlsx]

## Sheet: Table S1
ST1: AD vs CO estimates
Protein	Estimate	SE	P_Value	Sample_Size	FDR	Significant
pTau-217	0.256094	0.00914114	1.6201e-151	2659	1.99273e-149	Significant_Positive
GFAP	0.16185	0.00801109	1.56627e-84	2654	9.63257e-83	Significant_Positive
pTau-231	0.160829	0.00855886	4.92799e-74	2645	2.02047e-72	Significant_Positive
NEFL	0.0906151	0.00716704	1.30588e-35	2627	4.01559e-34	Significant_Positive
pTau-181	0.100221	0.00813952	6.46965e-34	2644	1.59153e-32	Significant_Positive
Aβ42	-0.126819	0.0108358	7.54309e-31	2528	1.54633e-29	Significant_Negative
NPTXR	-0.0665637	0.00599719	5.26303e-28	2631	9.2479e-27	Significant_Negative
ACHE	0.0708964	0.00647724	2.89452e-27	2493	4.45032e-26	Significant_Positive
BDNF	-0.205	0.0232224	1.8978e-18	2666	2.59366e-17	Significant_Negative
IL7	-0.0902841	0.0102658	2.53005e-18	2661	3.11196e-17	Significant_Negative
Aβ38	-0.0775657	0.00988796	6.30523e-15	2595	7.0504e-14	Significant_Negative
MAPT	0.0547415	0.00722448	4.86092e-14	2634	4.98244e-13	Significant_Positive
Aβ40	-0.0599594	0.0085505	2.97507e-12	2606	2.81487e-11	Significant_Negative
VEGFD	0.0677581	0.0103115	6.05994e-11	2498	5.32409e-10	Significant_Positive
VEGFA	-0.0347208	0.00531276	7.60163e-11	2621	6.23334e-10	Significant_Negative
SNCA	-0.0617805	0.00958416	1.35959e-10	2646	1.04518e-09	Significant_Negative
MDH1	-0.0580682	0.00917134	2.84629e-10	2632	2.05938e-09	Significant_Negative
TIMP3	-0.0982848	0.0163418	2.05744e-09	2632	1.40591e-08	Significant_Negative
PGK1	-0.0606119	0.0102486	3.77046e-09	2621	2.44088e-08	Significant_Negative
HBA1	-0.145956	0.0253627	9.71334e-09	2562	5.9737e-08	Significant_Negative
SOD1	-0.0538831	0.00939187	1.0738e-08	2608	6.28938e-08	Significant_Negative
pSNCA-129	-0.0530076	0.00992881	1.01608e-07	2627	5.68081e-07	Significant_Negative
ENO2	-0.0715574	0.0139576	3.17333e-07	2504	1.69704e-06	Significant_Negative
CCL2	0.0341293	0.00674573	4.49867e-07	2611	2.30557e-06	Significant_Positive
FABP3	-0.0308841	0.00647344	1.9343e-06	2636	9.51676e-06	Significant_Negative
SNAP25	0.0187294	0.00394877	2.21811e-06	2613	1.04934e-05	Significant_Positive
PARK7	-0.057137	0.0121458	2.68263e-06	2579	1.22209e-05	Significant_Negative
KLK6	-0.0287094	0.00620211	3.85244e-06	2646	1.69232e-05	Significant_Negative
TAFA5	-0.0467072	0.0104762	8.61102e-06	2583	3.65226e-05	Significant_Negative
IL15	-0.0202849	0.00455751	8.90962e-06	2626	3.65294e-05	Significant_Negative
CRP	-0.0505164	0.0114129	9.97978e-06	2629	3.95972e-05	Significant_Negative
CXCL1	-0.0495147	0.0112553	1.13068e-05	2572	4.34606e-05	Significant_Negative
CXCL10	-0.0382513	0.00876342	1.3215e-05	2611	4.9256e-05	Significant_Negative
IL6R	-0.0246584	0.0056927	1.53649e-05	2607	5.55848e-05	Significant_Negative
CHIT1	0.0469678	0.0109477	1.85179e-05	2546	6.50772e-05	Significant_Positive
SQSTM1	-0.0324274	0.00768183	2.51364e-05	2563	8.58826e-05	Significant_Negative
TEK	-0.0192582	0.00462474	3.22545e-05	2634	0.000107224	Significant_Negative
CCL17	-0.0565368	0.013722	3.90394e-05	2620	0.000123124	Significant_Negative
MME	-0.0923764	0.0224177	3.89375e-05	2647	0.000123124	Significant_Negative
CCL26	0.0340256	0.00832993	4.54872e-05	2556	0.000136462	Significant_Positive
IL5	-0.0483356	0.0118335	4.54724e-05	2616	0.000136462	Significant_Negative
AGRN	-0.0175568	0.00439751	6.71916e-05	2632	0.000193421	Significant_Negative
CSF2	-0.0265657	0.00665635	6.76188e-05	2590	0.000193421	Significant_Negative
CST3	-0.0102159	0.00258086	7.7518e-05	2578	0.000216698	Significant_Negative
IGFBP7	-0.0148607	0.00396207	0.000180141	2623	0.000492385	Significant_Negative
CCL4	-0.0327071	0.00898309	0.000277067	2535	0.000740854	Significant_Negative
NPY	-0.0319169	0.0090244	0.000413167	2291	0.00108127	Significant_Negative
IL13	-0.0402226	0.0116463	0.000562137	2529	0.00144048	Significant_Negative
IFNG	-0.0374662	0.0109795	0.000653955	2581	0.00164156	Significant_Negative
NRGN	-0.0483146	0.0145745	0.000928942	2617	0.0022852	Significant_Negative
IL16	-0.0164949	0.00509377	0.00121771	2615	0.00293684	Significant_Negative
APOE	0.0215523	0.00666811	0.00124387	2624	0.00294224	Significant_Positive
SLIT2	-0.0160296	0.00499044	0.00133417	2572	0.00309627	Significant_Negative
ICAM1	-0.0159161	0.0049807	0.00141256	2578	0.00321749	Significant_Negative
NEFH	0.0979773	0.0311552	0.0016804	2650	0.00369089	Significant_Positive
POSTN	-0.0251323	0.00798141	0.00165823	2533	0.00369089	Significant_Negative
TNF	-0.0169515	0.00544876	0.00188421	2615	0.00406593	Significant_Negative
TARDBP	-0.0304677	0.00991538	0.00214247	2645	0.00454352	Significant_Negative
KDR	-0.021735	0.00741825	0.00342075	2529	0.0071314	Significant_Negative
IL2	-0.0216429	0.00740227	0.00348736	2618	0.0071491	Significant_Negative
CNTN2	-0.0300102	0.0105047	0.00431267	2634	0.00869603	Significant_Negative
FLT1	-0.0208643	0.00737426	0.0047004	2596	0.00932498	Significant_Negative
GOT1	-0.0166934	0.00591882	0.00483261	2625	0.0094351	Significant_Negative
PGF	-0.0129058	0.00464584	0.00550942	2637	0.0105884	Significant_Negative
Oligo-SNCA	-0.0429026	0.0157179	0.0063856	2576	0.0120835	Significant_Negative
FOLR1	-0.0155917	0.00575224	0.00676104	2637	0.0124121	Significant_Negative
IL33	-0.0160438	0.00591709	0.00674318	2608	0.0124121	Significant_Negative
IL12p70	-0.0238419	0.0088275	0.00696066	2609	0.0125906	Significant_Negative
CCL3	-0.01604	0.00637537	0.0119325	2575	0.0212709	Significant_Negative
GDF15	-0.0231767	0.00938185	0.0135622	2546	0.0238307	Significant_Negative
CD63	-0.014715	0.00601281	0.0144595	2615	0.0250495	Significant_Negative
REST	-0.0151357	0.00620202	0.0147353	2605	0.0251728	Significant_Negative
PSEN1	-0.0204777	0.00851055	0.0161916	2573	0.0272818	Significant_Negative
CRH	0.0283047	0.0120037	0.0184472	2635	0.0306623	Significant_Positive
NPTX2	0.0121854	0.00520528	0.019308	2631	0.0316651	Significant_Positive
GDI1	-0.00865564	0.00371846	0.0200013	2622	0.0323705	Significant_Negative
PRDX6	-0.0260965	0.0113093	0.021102	2647	0.0337084	Significant_Negative
HTT	-0.0182084	0.0082828	0.028012	2638	0.0441727	Significant_Negative
BACE1	0.00906789	0.00429088	0.0346695	2639	0.0539792	Not_Significant
pTDP43-409	0.0148442	0.00726599	0.0411571	2576	0.0624978	Not_Significant
YWHAZ	0.0257093	0.0125799	0.0410847	2635	0.0624978	Not_Significant
RUVBL2	0.0202591	0.0100653	0.0442402	2646	0.0663603	Not_Significant
TREM2	0.0152119	0.00761358	0.0458195	2651	0.0679012	Not_Significant
IL18	-0.0138981	0.00708482	0.0499066	2615	0.0730775	Not_Significant
CCL22	-0.011804	0.00639481	0.0650246	2609	0.0940944	Not_Significant
SNCB	0.0113051	0.00614848	0.0660776	2567	0.0945064	Not_Significant
IL6	-0.0185413	0.0102813	0.0714413	2605	0.101003	Not_Significant
TREM1	-0.0113159	0.00631026	0.0730468	2640	0.1021	Not_Significant
IL9	-0.0183502	0.0109052	0.0925515	2625	0.127908	Not_Significant
CXCL8	-0.0102988	0.00615097	0.0941849	2597	0.128663	Not_Significant
IL4	-0.0133568	0.0080017	0.0951897	2618	0.128663	Not_Significant
IL10	-0.0120467	0.00755521	0.110948	2586	0.148333	Not_Significant
PTN	0.0112734	0.00744036	0.129851	2621	0.171738	Not_Significant
S100B	-0.0092651	0.00619512	0.134893	2605	0.176509	Not_Significant
FCN2	-0.0105003	0.00718975	0.144284	2613	0.18681	Not_Significant
NPTX1	-0.00912632	0.00665209	0.170197	2628	0.218065	Not_Significant
PDGFRB	-0.0118876	0.00890869	0.182195	2659	0.23103	Not_Significant
VCAM1	0.00545195	0.00465418	0.241539	2647	0.303156	Not_Significant
IL17A	0.0149031	0.0131389	0.256787	2521	0.319038	Not_Significant
VSNL1	0.00514202	0.00484382	0.288533	2613	0.354895	Not_Significant
CX3CL1	-0.00437936	0.00452388	0.333106	2633	0.405664	Not_Significant
CALB2	-0.00607506	0.00649132	0.349424	2637	0.421365	Not_Significant
CCL11	0.00599611	0.0065803	0.362263	2603	0.432605	Not_Significant
CD40LG	0.00709216	0.00804632	0.378174	2603	0.443556	Not_Significant
SAA1	-0.0165695	0.0188173	0.378646	2617	0.443556	Not_Significant
ARSA	0.00962287	0.0125456	0.443132	2612	0.514201	Not_Significant
FGF2	-0.0086315	0.0119736	0.47105	2645	0.537838	Not_Significant
SMOC1	0.00874517	0.0121641	0.472248	2556	0.537838	Not_Significant
UCHL1	-0.00410434	0.00645268	0.524787	2655	0.592191	Not_Significant
IGF1R	-0.00176508	0.00287008	0.538612	2638	0.602266	Not_Significant
CHI3L1	0.00727984	0.0121043	0.547607	2637	0.606808	Not_Significant
ANXA5	-0.00366041	0.0085423	0.668319	2643	0.733957	Not_Significant
IL1B	-0.000902337	0.00244315	0.71191	2560	0.761434	Not_Significant
NGF	-0.0020031	0.00530259	0.70564	2617	0.761434	Not_Significant
S100A12	0.00436505	0.01166	0.708165	2662	0.761434	Not_Significant
MSLN	-0.00409065	0.0113962	0.719662	2655	0.76309	Not_Significant
GDNF	0.00691066	0.0215351	0.748311	2591	0.786685	Not_Significant
PDLIM5	-0.00521757	0.0185712	0.778772	2563	0.811771	Not_Significant
SFRP1	-0.00283095	0.0128371	0.825478	2453	0.853225	Not_Significant
SFTPD	-0.00221711	0.0105978	0.834305	2642	0.855162	Not_Significant
VGF	-0.00166232	0.0127212	0.896044	2582	0.910855	Not_Significant
BASP1	-0.00149623	0.0167714	0.928919	2548	0.928919	Not_Significant
CCL13	0.000732224	0.00752178	0.922458	2619	0.928919	Not_Significant

## Sheet: Table S2
ST2: DLB vs CO estimates
Protein	Estimate	SE	P_Value	Sample_Size	FDR	Significant
GFAP	0.154452	0.0364141	2.34799e-05	1595	0.00288803	Significant_Positive
NEFL	0.122583	0.0308102	7.24518e-05	1582	0.00445579	Significant_Positive
ACHE	0.0785645	0.0255832	0.00217013	1593	0.0694584	Not_Significant
Aβ38	-0.128508	0.0420101	0.00225881	1560	0.0694584	Not_Significant
pTau-217	0.112216	0.0376329	0.00290836	1603	0.0715458	Not_Significant
IL7	-0.125502	0.0449578	0.00530808	1600	0.0937303	Not_Significant
BDNF	-0.270071	0.0968012	0.00533425	1603	0.0937303	Not_Significant
MSLN	0.135756	0.0523891	0.00964893	1598	0.148352	Not_Significant
Aβ40	-0.0838196	0.0349772	0.0166735	1569	0.227871	Not_Significant
pTau-231	0.0802232	0.0349034	0.0216665	1594	0.266498	Not_Significant
NPTXR	-0.0599803	0.0273513	0.0284558	1583	0.310302	Not_Significant
NPTX2	0.0497946	0.023173	0.0318012	1577	0.310302	Not_Significant
SMOC1	0.124103	0.0590479	0.0357412	1527	0.310302	Not_Significant
CCL17	-0.127261	0.0610375	0.0372334	1576	0.310302	Not_Significant
IL9	-0.101819	0.0491206	0.0383497	1576	0.310302	Not_Significant
CX3CL1	0.0408874	0.0201471	0.04258	1587	0.310302	Not_Significant
Aβ42	-0.0951606	0.0470602	0.0433396	1534	0.310302	Not_Significant
YWHAZ	0.118731	0.0592936	0.04541	1588	0.310302	Not_Significant
IL6R	-0.0481549	0.0248683	0.0529996	1568	0.343103	Not_Significant
PGF	-0.0386028	0.0206246	0.0614339	1586	0.377819	Not_Significant
CCL2	0.0582618	0.0315992	0.0654045	1571	0.383084	Not_Significant
CCL26	0.0708915	0.0397251	0.074531	1546	0.416696	Not_Significant
VEGFD	0.0842481	0.047871	0.0786272	1521	0.420485	Not_Significant
CCL4	-0.0714079	0.0419099	0.0886147	1525	0.439913	Not_Significant
SAA1	0.149181	0.0877768	0.0894132	1576	0.439913	Not_Significant
SOD1	-0.0545169	0.0327265	0.0959479	1560	0.440185	Not_Significant
CRH	-0.0932531	0.0560946	0.0966259	1584	0.440185	Not_Significant
ARSA	0.089671	0.055608	0.107043	1567	0.456087	Not_Significant
MDH1	-0.049479	0.0308149	0.108543	1581	0.456087	Not_Significant
IGFBP7	-0.0267248	0.0167707	0.111241	1578	0.456087	Not_Significant
CNTN2	-0.0729378	0.0475539	0.125282	1584	0.484969	Not_Significant
NPY	-0.0608754	0.0402193	0.130357	1401	0.484969	Not_Significant
ANXA5	0.103046	0.0680961	0.130419	1591	0.484969	Not_Significant
CHIT1	0.0736393	0.0491226	0.134056	1530	0.484969	Not_Significant
SNCA	-0.0396458	0.0270542	0.143005	1589	0.502559	Not_Significant
NRGN	0.0880449	0.0618728	0.154935	1576	0.517645	Not_Significant
IL2	-0.048406	0.0340811	0.155714	1571	0.517645	Not_Significant
GOT1	-0.0350104	0.0254636	0.169352	1580	0.548165	Not_Significant
CXCL1	-0.0701625	0.0518342	0.176064	1544	0.553051	Not_Significant
APOE	0.0411732	0.0306851	0.179854	1587	0.553051	Not_Significant
CD40LG	0.0500915	0.0385456	0.193951	1563	0.573351	Not_Significant
BASP1	-0.10795	0.0834079	0.195779	1529	0.573351	Not_Significant
CD63	-0.0331398	0.0268806	0.217817	1569	0.623058	Not_Significant
S100B	-0.0336177	0.0278079	0.226873	1568	0.634214	Not_Significant
IL13	-0.066268	0.0567096	0.242771	1510	0.663573	Not_Significant
pTau-181	0.0399577	0.034868	0.251981	1591	0.664117	Not_Significant
IL12p70	-0.045469	0.039827	0.253768	1570	0.664117	Not_Significant
IL5	-0.0619457	0.0552162	0.262088	1566	0.671601	Not_Significant
ENO2	-0.061488	0.058881	0.296526	1512	0.702725	Not_Significant
PDLIM5	0.101993	0.0982866	0.299568	1539	0.702725	Not_Significant
GDI1	0.0167661	0.0164153	0.307236	1578	0.702725	Not_Significant
Oligo-SNCA	0.0566	0.0554205	0.307281	1542	0.702725	Not_Significant
pTDP43-409	-0.0362991	0.0357756	0.310441	1540	0.702725	Not_Significant
NGF	-0.0235811	0.0234916	0.315626	1571	0.702725	Not_Significant
PARK7	-0.0523604	0.0522151	0.316122	1556	0.702725	Not_Significant
CRP	0.0519762	0.0522429	0.31994	1581	0.702725	Not_Significant
TNF	-0.0231778	0.0240175	0.334674	1568	0.710188	Not_Significant
CXCL10	-0.0386212	0.0405086	0.340531	1566	0.710188	Not_Significant
IL17A	0.0579322	0.0609476	0.341998	1515	0.710188	Not_Significant
TIMP3	-0.0670632	0.0712065	0.346433	1581	0.710188	Not_Significant
IFNG	0.046254	0.0499303	0.354399	1546	0.714607	Not_Significant
TREM1	-0.0236626	0.0269097	0.379354	1589	0.743063	Not_Significant
FLT1	0.0300788	0.0342953	0.380593	1564	0.743063	Not_Significant
NEFH	0.0523057	0.0609244	0.390727	1594	0.750929	Not_Significant
IL6	0.0405545	0.0485353	0.403526	1566	0.763596	Not_Significant
PGK1	-0.0254758	0.031912	0.42481	1571	0.791691	Not_Significant
VEGFA	-0.0179704	0.0228445	0.431611	1578	0.79236	Not_Significant
FABP3	-0.0217309	0.0281054	0.439523	1583	0.795019	Not_Significant
FGF2	0.042328	0.0566468	0.455038	1588	0.803016	Not_Significant
CSF2	-0.0218726	0.0296215	0.460381	1566	0.803016	Not_Significant
CHI3L1	0.0406421	0.0554292	0.463529	1588	0.803016	Not_Significant
IL4	-0.0272226	0.038435	0.47888	1571	0.807237	Not_Significant
CCL22	-0.0204728	0.0292417	0.483953	1567	0.807237	Not_Significant
HBA1	-0.0707639	0.101467	0.485655	1540	0.807237	Not_Significant
CST3	-0.00768825	0.0114336	0.501415	1549	0.82232	Not_Significant
SLIT2	0.0151857	0.0236808	0.521443	1547	0.841091	Not_Significant
CXCL8	-0.0177966	0.0284131	0.531176	1559	0.841091	Not_Significant
TAFA5	-0.0276129	0.0450625	0.540119	1555	0.841091	Not_Significant
VCAM1	-0.0122253	0.0206739	0.554377	1591	0.841091	Not_Significant
IL18	0.0187433	0.031781	0.555433	1571	0.841091	Not_Significant
PSEN1	-0.0243426	0.0413146	0.555813	1543	0.841091	Not_Significant
PRDX6	0.0257734	0.0447353	0.564609	1590	0.841091	Not_Significant
UCHL1	-0.0173877	0.0309087	0.573819	1596	0.841091	Not_Significant
KLK6	0.0150926	0.0272216	0.579359	1593	0.841091	Not_Significant
NPTX1	-0.0165672	0.0302967	0.584572	1580	0.841091	Not_Significant
S100A12	0.0381579	0.0706812	0.589369	1600	0.841091	Not_Significant
GDNF	0.0526081	0.099642	0.597595	1556	0.841091	Not_Significant
SNAP25	0.0088752	0.0170644	0.603068	1575	0.841091	Not_Significant
VGF	-0.0522124	0.10194	0.608595	1548	0.841091	Not_Significant
TEK	-0.0094259	0.0204992	0.645709	1583	0.88247	Not_Significant
VSNL1	0.00960533	0.021705	0.65816	1568	0.882721	Not_Significant
FCN2	0.0148731	0.033829	0.660246	1574	0.882721	Not_Significant
CALB2	-0.0131347	0.0307407	0.669239	1581	0.885122	Not_Significant
IL33	-0.0106235	0.0266456	0.690173	1571	0.886836	Not_Significant
MAPT	0.0116794	0.0306515	0.703227	1582	0.886836	Not_Significant
IL15	-0.00745188	0.0198318	0.70715	1578	0.886836	Not_Significant
CCL11	-0.0108246	0.0290914	0.709876	1571	0.886836	Not_Significant
POSTN	-0.0125985	0.0345886	0.71573	1528	0.886836	Not_Significant
IL1B	-0.00398952	0.0114805	0.728261	1532	0.886836	Not_Significant
GDF15	0.0142009	0.0417631	0.733878	1527	0.886836	Not_Significant
FOLR1	0.00834185	0.0251522	0.740193	1583	0.886836	Not_Significant
SFTPD	-0.0163491	0.0494714	0.741084	1591	0.886836	Not_Significant
RUVBL2	0.0150624	0.0458628	0.742635	1589	0.886836	Not_Significant
SQSTM1	-0.00935795	0.0319689	0.769776	1537	0.910408	Not_Significant
ICAM1	-0.00606916	0.021915	0.781862	1560	0.915896	Not_Significant
BACE1	-0.00457571	0.0188551	0.808287	1591	0.937918	Not_Significant
pSNCA-129	-0.00613608	0.0280068	0.826606	1576	0.945801	Not_Significant
SFRP1	0.0122429	0.0595297	0.837085	1476	0.945801	Not_Significant
IGF1R	-0.00251607	0.0123158	0.838149	1592	0.945801	Not_Significant
TARDBP	-0.00732002	0.0395503	0.853189	1587	0.954021	Not_Significant
MME	-0.0183771	0.107161	0.863861	1590	0.957251	Not_Significant
REST	-0.00403809	0.0264804	0.878817	1565	0.963495	Not_Significant
PDGFRB	0.00589747	0.0408266	0.885162	1601	0.963495	Not_Significant
IL16	0.00267475	0.0232507	0.908429	1570	0.967515	Not_Significant
HTT	0.00348535	0.0305252	0.90911	1582	0.967515	Not_Significant
AGRN	0.00185192	0.0194473	0.924146	1584	0.967515	Not_Significant
SNCB	-0.00253825	0.0278298	0.927341	1541	0.967515	Not_Significant
TREM2	0.00305683	0.0339111	0.928185	1593	0.967515	Not_Significant
KDR	0.00264189	0.0355689	0.940801	1522	0.972425	Not_Significant
PTN	-0.00177991	0.0358458	0.960404	1573	0.979251	Not_Significant
IL10	0.00153515	0.033384	0.963329	1553	0.979251	Not_Significant
CCL3	-0.000545442	0.028365	0.984661	1551	0.992732	Not_Significant
CCL13	5.1452e-05	0.0339276	0.99879	1578	0.99879	Not_Significant

## Sheet: Table S3
ST3: FTD vs CO estimates
Protein	Estimate	SE	P_Value	Sample_Size	FDR	Significant
NEFL	0.274358	0.0253977	2.67761e-26	1595	3.29346e-24	Significant_Positive
GFAP	0.117686	0.0303504	0.000109773	1606	0.00675102	Significant_Positive
TREM2	0.0865764	0.0287961	0.00268369	1604	0.110031	Not_Significant
APOE	0.0746333	0.0257378	0.00378574	1599	0.116412	Not_Significant
CXCL1	-0.119848	0.0429135	0.00528994	1556	0.127867	Not_Significant
CCL2	0.0744782	0.0271945	0.00623739	1581	0.127867	Not_Significant
TEK	-0.038622	0.017297	0.0256962	1594	0.40606	Not_Significant
CHIT1	0.0958656	0.0431385	0.0264104	1539	0.40606	Not_Significant
NPTX1	-0.0550219	0.0261795	0.0357355	1590	0.462972	Not_Significant
TAFA5	0.0778715	0.0374287	0.03764	1565	0.462972	Not_Significant
NPTXR	-0.0454286	0.0228786	0.0472453	1594	0.497126	Not_Significant
VEGFD	0.0787941	0.0403546	0.0510562	1533	0.497126	Not_Significant
TARDBP	0.0677883	0.0349403	0.0525418	1599	0.497126	Not_Significant
CCL13	0.0532776	0.0289178	0.0656057	1589	0.557202	Not_Significant
IL9	-0.07317	0.0415564	0.0784758	1587	0.557202	Not_Significant
Aβ38	-0.0586306	0.0341739	0.0864229	1571	0.557202	Not_Significant
BDNF	-0.135048	0.0789355	0.0872987	1614	0.557202	Not_Significant
CD40LG	0.0532382	0.0320041	0.0964157	1574	0.557202	Not_Significant
BASP1	-0.117537	0.0719042	0.102331	1539	0.557202	Not_Significant
MME	0.147972	0.0912997	0.105274	1601	0.557202	Not_Significant
IL7	-0.0595023	0.036917	0.107205	1611	0.557202	Not_Significant
IFNG	-0.0694281	0.0431297	0.107656	1556	0.557202	Not_Significant
SNCA	-0.0367624	0.0232369	0.113832	1600	0.557202	Not_Significant
GDNF	-0.135161	0.0857602	0.115221	1567	0.557202	Not_Significant
SNCB	0.0378746	0.0241387	0.116844	1551	0.557202	Not_Significant
REST	0.0348616	0.0224383	0.120466	1576	0.557202	Not_Significant
HBA1	-0.139514	0.0913351	0.126842	1550	0.557202	Not_Significant
ANXA5	0.0851226	0.0557936	0.12729	1602	0.557202	Not_Significant
FGF2	0.071691	0.0477937	0.13381	1599	0.557202	Not_Significant
AGRN	0.0235137	0.0157601	0.135903	1596	0.557202	Not_Significant
MAPT	0.0358435	0.0246096	0.145456	1593	0.577132	Not_Significant
UCHL1	-0.0380245	0.0264349	0.150511	1606	0.578525	Not_Significant
CRH	-0.0659577	0.047917	0.168861	1595	0.623975	Not_Significant
IL13	-0.0639733	0.0468696	0.172481	1521	0.623975	Not_Significant
HTT	0.0354435	0.0264799	0.180924	1594	0.630659	Not_Significant
RUVBL2	0.0522289	0.0396628	0.188087	1601	0.630659	Not_Significant
PTN	-0.0390757	0.0300008	0.19294	1585	0.630659	Not_Significant
SLIT2	-0.0242071	0.0187984	0.198035	1561	0.630659	Not_Significant
ACHE	0.0277169	0.0216403	0.200449	1602	0.630659	Not_Significant
SQSTM1	0.0347243	0.0273913	0.205092	1546	0.630659	Not_Significant
Aβ42	-0.0458444	0.0389585	0.239477	1545	0.718432	Not_Significant
Oligo-SNCA	-0.0570645	0.0498335	0.252344	1551	0.726588	Not_Significant
POSTN	0.0333656	0.0294632	0.257621	1538	0.726588	Not_Significant
pTau-231	0.0307131	0.0282719	0.277488	1605	0.726588	Not_Significant
BACE1	-0.0170386	0.0158489	0.282509	1602	0.726588	Not_Significant
KLK6	-0.0232445	0.0219739	0.290296	1605	0.726588	Not_Significant
GDF15	0.0364719	0.0351198	0.299201	1537	0.726588	Not_Significant
IL4	-0.0320869	0.0315546	0.309372	1584	0.726588	Not_Significant
GDI1	-0.0140549	0.013843	0.310116	1588	0.726588	Not_Significant
IL15	-0.0167059	0.0166206	0.314987	1589	0.726588	Not_Significant
VSNL1	0.0184239	0.0184189	0.317332	1579	0.726588	Not_Significant
IL12p70	-0.0340492	0.0343059	0.321099	1580	0.726588	Not_Significant
pTau-217	0.030452	0.0308324	0.323467	1614	0.726588	Not_Significant
MDH1	-0.025577	0.0262143	0.329368	1591	0.726588	Not_Significant
PDLIM5	-0.0796428	0.0826185	0.335206	1551	0.726588	Not_Significant
PARK7	-0.0417703	0.0433573	0.335498	1567	0.726588	Not_Significant
PGF	0.0165022	0.0173608	0.341981	1597	0.726588	Not_Significant
FOLR1	0.0199133	0.0209771	0.342619	1594	0.726588	Not_Significant
CSF2	-0.022378	0.0248156	0.367315	1577	0.759675	Not_Significant
IL5	0.0410403	0.0458214	0.370573	1578	0.759675	Not_Significant
TIMP3	0.0506726	0.0590435	0.390897	1592	0.777756	Not_Significant
CCL4	-0.0293673	0.0343009	0.392039	1537	0.777756	Not_Significant
CCL17	-0.0421805	0.0501663	0.40058	1587	0.782084	Not_Significant
SNAP25	-0.0106318	0.0143921	0.460185	1586	0.853848	Not_Significant
PSEN1	0.0261008	0.0355319	0.462711	1554	0.853848	Not_Significant
S100B	0.0174633	0.0238296	0.463766	1579	0.853848	Not_Significant
PGK1	-0.0187961	0.0261333	0.4721	1582	0.853848	Not_Significant
FLT1	0.0207476	0.0290691	0.475497	1575	0.853848	Not_Significant
CD63	0.0159189	0.0226768	0.482787	1580	0.853848	Not_Significant
ICAM1	-0.0132081	0.018951	0.48593	1569	0.853848	Not_Significant
VGF	-0.0582857	0.0862024	0.499046	1559	0.864545	Not_Significant
IL6R	-0.013657	0.0209774	0.51512	1579	0.879997	Not_Significant
CALB2	0.0158112	0.0253666	0.533171	1593	0.890559	Not_Significant
CCL26	-0.0197669	0.0329296	0.54841	1558	0.890559	Not_Significant
ENO2	-0.0282873	0.0475926	0.552357	1525	0.890559	Not_Significant
KDR	0.0178733	0.030211	0.554196	1532	0.890559	Not_Significant
MSLN	0.025542	0.0437766	0.559663	1609	0.890559	Not_Significant
NPY	-0.0196174	0.0340613	0.564745	1410	0.890559	Not_Significant
CX3CL1	0.00928696	0.0170258	0.585511	1598	0.911618	Not_Significant
Aβ40	-0.0141261	0.0283038	0.617788	1580	0.940722	Not_Significant
IGF1R	-0.00503093	0.0101296	0.6195	1604	0.940722	Not_Significant
IGFBP7	0.00635114	0.0136598	0.64203	1590	0.951759	Not_Significant
VEGFA	0.00838308	0.0185637	0.651629	1589	0.951759	Not_Significant
YWHAZ	-0.0218932	0.0489404	0.654687	1599	0.951759	Not_Significant
TNF	-0.00878353	0.0198208	0.65772	1579	0.951759	Not_Significant
IL16	0.0075745	0.0197644	0.701594	1581	0.967139	Not_Significant
S100A12	0.0224095	0.0613804	0.715091	1611	0.967139	Not_Significant
SFTPD	-0.0153287	0.042216	0.716576	1602	0.967139	Not_Significant
SOD1	-0.0100795	0.0282541	0.721331	1571	0.967139	Not_Significant
CCL22	0.00839136	0.0241724	0.728528	1579	0.967139	Not_Significant
ARSA	0.0153791	0.0446899	0.730796	1578	0.967139	Not_Significant
CRP	0.0150398	0.0446536	0.736304	1592	0.967139	Not_Significant
PDGFRB	-0.0113676	0.0347343	0.743503	1612	0.967139	Not_Significant
CCL11	-0.00787797	0.0243007	0.74584	1582	0.967139	Not_Significant
NRGN	-0.0164323	0.0511828	0.748214	1587	0.967139	Not_Significant
pSNCA-129	-0.00735749	0.0235577	0.75484	1587	0.967139	Not_Significant
pTau-181	0.00806326	0.0284157	0.776631	1602	0.974992	Not_Significant
GOT1	0.00597623	0.0220739	0.786628	1589	0.974992	Not_Significant
NEFH	-0.0158468	0.0675738	0.814619	1604	0.974992	Not_Significant
NGF	0.00419652	0.0198621	0.832694	1582	0.974992	Not_Significant
SMOC1	-0.0105352	0.0500252	0.833229	1538	0.974992	Not_Significant
IL6	-0.00897664	0.0427108	0.83356	1574	0.974992	Not_Significant
IL1B	0.0018611	0.00962911	0.846766	1544	0.974992	Not_Significant
IL33	-0.00423147	0.0222364	0.849102	1582	0.974992	Not_Significant
CCL3	0.00434277	0.0237387	0.854869	1562	0.974992	Not_Significant
CXCL8	0.00428516	0.0235113	0.855403	1571	0.974992	Not_Significant
CST3	0.00169475	0.00995246	0.864809	1557	0.974992	Not_Significant
SAA1	0.0122427	0.0743731	0.869271	1586	0.974992	Not_Significant
IL2	-0.00442362	0.0281841	0.875301	1583	0.974992	Not_Significant
IL10	0.00420896	0.0281732	0.88126	1564	0.974992	Not_Significant
NPTX2	-0.00286678	0.0195048	0.883168	1588	0.974992	Not_Significant
IL17A	-0.00707623	0.052506	0.892812	1524	0.974992	Not_Significant
PRDX6	-0.00468009	0.0369848	0.89932	1601	0.974992	Not_Significant
CNTN2	0.00447113	0.041463	0.914141	1593	0.974992	Not_Significant
FCN2	-0.00280474	0.0288928	0.92268	1585	0.974992	Not_Significant
VCAM1	0.00141024	0.0175303	0.935893	1602	0.974992	Not_Significant
TREM1	-0.00154564	0.0222988	0.944747	1600	0.974992	Not_Significant
CXCL10	0.00236231	0.0345596	0.945512	1576	0.974992	Not_Significant
IL18	-0.00157745	0.0262173	0.952029	1582	0.974992	Not_Significant
FABP3	-0.00113873	0.0233876	0.961173	1594	0.974992	Not_Significant
SFRP1	0.00226264	0.0499074	0.963845	1488	0.974992	Not_Significant
pTDP43-409	-0.00125721	0.0304441	0.967066	1552	0.974992	Not_Significant
CHI3L1	-0.000634198	0.0467072	0.989168	1599	0.989168	Not_Significant

## Sheet: Table S4
ST4: PD vs CO estimates
Protein	Estimate	SE	P_Value	Sample_Size	FDR	Significant
PARK7	0.337522	0.0924317	0.000269398	1538	0.033136	Significant_Positive
TARDBP	-0.187072	0.0698631	0.00749082	1569	0.293009	Not_Significant
NEFL	0.140472	0.0536909	0.00897432	1564	0.293009	Not_Significant
VCAM1	0.0931922	0.0359028	0.00952874	1572	0.293009	Not_Significant
CCL13	-0.148518	0.0591837	0.0121936	1559	0.299962	Not_Significant
BACE1	0.0766675	0.0325595	0.0186611	1572	0.324776	Not_Significant
IL9	-0.194735	0.085495	0.0228776	1557	0.324776	Not_Significant
GFAP	0.136873	0.0614951	0.0261723	1577	0.324776	Not_Significant
RUVBL2	-0.183337	0.0824722	0.0263568	1571	0.324776	Not_Significant
ENO2	0.221178	0.100806	0.0283827	1495	0.324776	Not_Significant
PDGFRB	0.153439	0.0713101	0.0315711	1582	0.324776	Not_Significant
MDH1	-0.119499	0.0563003	0.0339515	1562	0.324776	Not_Significant
SOD1	-0.131575	0.063268	0.0377237	1540	0.324776	Not_Significant
CALB2	0.108128	0.0525356	0.0397378	1563	0.324776	Not_Significant
Oligo-SNCA	0.216209	0.106397	0.0423173	1523	0.324776	Not_Significant
IL7	-0.155683	0.0766958	0.0425374	1581	0.324776	Not_Significant
IL18	0.111299	0.0560594	0.0472792	1553	0.324776	Not_Significant
PTN	0.122957	0.0620013	0.0475281	1555	0.324776	Not_Significant
KDR	0.121297	0.0634777	0.056214	1504	0.363912	Not_Significant
NPY	-0.131442	0.0696659	0.0594048	1384	0.36534	Not_Significant
PRDX6	0.148391	0.0826065	0.0726308	1571	0.425409	Not_Significant
CX3CL1	0.0617914	0.0350318	0.0779498	1568	0.429106	Not_Significant
BDNF	-0.281557	0.163339	0.0849467	1584	0.429106	Not_Significant
CSF2	-0.0880302	0.0512347	0.0859655	1547	0.429106	Not_Significant
FOLR1	0.0734999	0.0430114	0.0876783	1564	0.429106	Not_Significant
SFRP1	-0.173289	0.102367	0.0907054	1458	0.429106	Not_Significant
SAA1	0.250198	0.153059	0.102326	1557	0.46615	Not_Significant
POSTN	0.0968056	0.0633627	0.126773	1508	0.494079	Not_Significant
CCL22	-0.0760866	0.0498306	0.126989	1549	0.494079	Not_Significant
HTT	-0.0843526	0.0553846	0.127953	1564	0.494079	Not_Significant
ARSA	0.147387	0.0990632	0.137005	1548	0.494079	Not_Significant
YWHAZ	0.153405	0.103208	0.137384	1569	0.494079	Not_Significant
VEGFD	0.129607	0.0876558	0.139459	1502	0.494079	Not_Significant
FLT1	-0.0870235	0.0590248	0.140591	1546	0.494079	Not_Significant
CHIT1	-0.126978	0.0861238	0.140592	1511	0.494079	Not_Significant
VEGFA	-0.055707	0.0384312	0.147393	1559	0.503593	Not_Significant
PDLIM5	-0.242718	0.169828	0.153154	1521	0.509132	Not_Significant
TIMP3	-0.164954	0.122082	0.176834	1562	0.549087	Not_Significant
IL13	-0.121882	0.0916797	0.183908	1495	0.549087	Not_Significant
IL2	-0.0767281	0.0581126	0.186919	1553	0.549087	Not_Significant
GOT1	-0.0583915	0.0442467	0.187136	1561	0.549087	Not_Significant
pTau-181	-0.0773958	0.0586951	0.187493	1572	0.549087	Not_Significant
IGF1R	0.0264029	0.0207124	0.202591	1574	0.575589	Not_Significant
CCL17	-0.13148	0.1039	0.205902	1557	0.575589	Not_Significant
CHI3L1	-0.117584	0.0966516	0.223949	1569	0.612127	Not_Significant
UCHL1	0.0623406	0.0539319	0.247892	1577	0.662843	Not_Significant
CNTN2	0.0935122	0.0833229	0.261913	1565	0.677881	Not_Significant
TAFA5	0.0897536	0.0804145	0.264539	1535	0.677881	Not_Significant
PGF	0.0384402	0.0356764	0.281437	1567	0.693241	Not_Significant
TEK	0.0374935	0.0355892	0.292273	1564	0.693241	Not_Significant
IL12p70	0.0727753	0.069809	0.297347	1551	0.693241	Not_Significant
SFTPD	0.0901341	0.0870246	0.300488	1572	0.693241	Not_Significant
NGF	0.0446405	0.0433359	0.303122	1551	0.693241	Not_Significant
MME	-0.192973	0.18781	0.30435	1571	0.693241	Not_Significant
ANXA5	0.109431	0.110081	0.320331	1572	0.694362	Not_Significant
FCN2	0.0621325	0.062711	0.321951	1554	0.694362	Not_Significant
GDI1	0.0278911	0.0281834	0.322509	1559	0.694362	Not_Significant
SNAP25	0.0285885	0.0295016	0.332672	1556	0.694362	Not_Significant
FABP3	-0.0468057	0.0483404	0.333068	1564	0.694362	Not_Significant
SNCA	-0.0485973	0.051323	0.34384	1570	0.704872	Not_Significant
CXCL10	-0.0650613	0.0704461	0.355859	1547	0.717552	Not_Significant
IL6R	0.0384322	0.0433841	0.375832	1549	0.742773	Not_Significant
IFNG	-0.0766461	0.0873627	0.380445	1527	0.742773	Not_Significant
pSNCA-129	-0.0452803	0.0532427	0.395206	1557	0.759536	Not_Significant
ICAM1	0.0317989	0.0382484	0.405888	1541	0.766671	Not_Significant
HBA1	0.147854	0.17994	0.411385	1521	0.766671	Not_Significant
pTau-231	-0.0461729	0.0582857	0.428375	1575	0.786419	Not_Significant
SMOC1	0.0831503	0.108969	0.445544	1507	0.798347	Not_Significant
ACHE	0.0328875	0.0437648	0.452488	1576	0.798347	Not_Significant
AGRN	0.0242228	0.032506	0.456276	1566	0.798347	Not_Significant
CCL11	0.0386527	0.0531038	0.466803	1551	0.798347	Not_Significant
CD40LG	-0.0468043	0.0643784	0.467325	1545	0.798347	Not_Significant
IL4	-0.0466374	0.0654629	0.476309	1554	0.802548	Not_Significant
PGK1	0.0417534	0.0602499	0.488411	1552	0.811123	Not_Significant
MSLN	0.0617866	0.0904383	0.494587	1579	0.811123	Not_Significant
SQSTM1	-0.0354238	0.0548341	0.518366	1518	0.83611	Not_Significant
IL17A	0.0665185	0.104223	0.523419	1497	0.83611	Not_Significant
CCL4	-0.0444742	0.0741369	0.548668	1507	0.861118	Not_Significant
IL16	-0.0239468	0.0403628	0.553075	1551	0.861118	Not_Significant
CD63	-0.0259729	0.0458124	0.570837	1551	0.861958	Not_Significant
S100B	-0.0274874	0.0486157	0.571882	1549	0.861958	Not_Significant
Aβ40	-0.0320869	0.0582844	0.582041	1550	0.861958	Not_Significant
SNCB	0.0281188	0.0520569	0.589169	1521	0.861958	Not_Significant
pTau-217	0.0338865	0.0635886	0.594177	1584	0.861958	Not_Significant
CST3	0.0104748	0.0197355	0.595662	1530	0.861958	Not_Significant
PSEN1	-0.0347965	0.0705943	0.622149	1525	0.889817	Not_Significant
NPTX1	0.0249465	0.0530545	0.638274	1561	0.901052	Not_Significant
IL10	0.0267122	0.0579075	0.644655	1534	0.901052	Not_Significant
CRP	0.0376538	0.0918409	0.681871	1562	0.94236	Not_Significant
BASP1	0.0574827	0.146696	0.695224	1510	0.946255	Not_Significant
IL1B	0.0084103	0.0218283	0.700075	1513	0.946255	Not_Significant
IL33	0.0169836	0.0458813	0.711311	1552	0.950992	Not_Significant
IL15	0.0116281	0.034204	0.73393	1559	0.969566	Not_Significant
FGF2	0.0319993	0.0977658	0.74348	1569	0.969566	Not_Significant
IL5	-0.0287773	0.0943081	0.760299	1548	0.969566	Not_Significant
NRGN	0.0283408	0.101167	0.779409	1557	0.969566	Not_Significant
VSNL1	0.00996689	0.0372097	0.788845	1550	0.969566	Not_Significant
SLIT2	0.0103301	0.040377	0.798108	1531	0.969566	Not_Significant
KLK6	0.0109579	0.0451627	0.808322	1575	0.969566	Not_Significant
MAPT	-0.0119203	0.0503198	0.812773	1564	0.969566	Not_Significant
CXCL8	-0.00961828	0.0513857	0.851546	1540	0.969566	Not_Significant
CXCL1	-0.0162804	0.0874915	0.852408	1526	0.969566	Not_Significant
CRH	0.0183082	0.0984063	0.852433	1565	0.969566	Not_Significant
NPTXR	-0.00839343	0.0463288	0.856257	1565	0.969566	Not_Significant
REST	0.00784634	0.0458874	0.864253	1546	0.969566	Not_Significant
VGF	0.0289655	0.175694	0.869073	1530	0.969566	Not_Significant
GDNF	0.0273281	0.175946	0.876589	1537	0.969566	Not_Significant
IL6	-0.0114516	0.0848786	0.892695	1547	0.969566	Not_Significant
pTDP43-409	0.00800229	0.0613611	0.896257	1523	0.969566	Not_Significant
S100A12	-0.0159107	0.124023	0.897937	1581	0.969566	Not_Significant
CCL3	0.00575421	0.0492053	0.906921	1532	0.969566	Not_Significant
TREM2	-0.0067893	0.059144	0.908624	1574	0.969566	Not_Significant
NEFH	0.0143603	0.131615	0.913131	1575	0.969566	Not_Significant
Aβ38	0.00785422	0.073272	0.91465	1541	0.969566	Not_Significant
TNF	-0.00392506	0.0412323	0.924173	1549	0.969566	Not_Significant
GDF15	-0.00775124	0.0865409	0.928643	1506	0.969566	Not_Significant
CCL2	-0.00461259	0.0551779	0.933389	1552	0.969566	Not_Significant
Aβ42	-0.00665677	0.0847819	0.937428	1514	0.969566	Not_Significant
TREM1	-0.00358124	0.0460602	0.938036	1570	0.969566	Not_Significant
APOE	-0.0024937	0.0527851	0.962326	1569	0.986384	Not_Significant
CCL26	-0.000936264	0.0658202	0.988653	1530	0.998741	Not_Significant
NPTX2	-0.000467101	0.0426496	0.991263	1557	0.998741	Not_Significant
IGFBP7	4.69438e-05	0.0297523	0.998741	1559	0.998741	Not_Significant

## Sheet: Table S5
ST5: Amyloid-PET estimates
Protein	Estimate	SE	P_Value	Sample_Size	FDR	Significant
ACHE	0.041636	0.0158053	0.00924875	168	0.1042	Not_Significant
AGRN	-0.0149525	0.012345	0.227542	171	0.753556	Not_Significant
ANXA5	-0.0160742	0.0374099	0.66799	171	0.982852	Not_Significant
APOE	0.0115498	0.0194332	0.553087	174	0.921734	Not_Significant
ARSA	-0.00770705	0.0202979	0.704656	172	0.982852	Not_Significant
Aβ38	-0.00605297	0.0258998	0.815498	173	0.993132	Not_Significant
Aβ40	-0.00979959	0.0205276	0.633716	172	0.974338	Not_Significant
Aβ42	-0.0714759	0.0229671	0.00218974	171	0.0336673	Significant_Negative
BACE1	0.0324494	0.0118212	0.00670918	174	0.0916922	Not_Significant
BASP1	0.0378128	0.0512813	0.46195	171	0.85835	Not_Significant
BDNF	-0.0455807	0.0579887	0.432959	174	0.85835	Not_Significant
CALB2	-0.00846397	0.0192588	0.660878	173	0.982852	Not_Significant
CCL11	-0.0273629	0.0175357	0.120567	172	0.570376	Not_Significant
CCL13	-0.0345446	0.0201588	0.0884537	173	0.479293	Not_Significant
CCL17	-0.0111509	0.0407168	0.784526	173	0.982852	Not_Significant
CCL2	-0.0022782	0.0192509	0.905939	172	0.994916	Not_Significant
CCL22	-0.0133946	0.0183955	0.467556	171	0.85835	Not_Significant
CCL26	-0.0320249	0.0201522	0.11393	172	0.560533	Not_Significant
CCL3	-0.0179572	0.018556	0.334624	168	0.809666	Not_Significant
CCL4	-0.007409	0.0253213	0.77021	165	0.982852	Not_Significant
CD40LG	-0.00287836	0.0213129	0.89274	166	0.993434	Not_Significant
CD63	0.0046558	0.017751	0.793426	173	0.982852	Not_Significant
CHI3L1	0.064916	0.0369974	0.0811604	173	0.475368	Not_Significant
CHIT1	0.0496743	0.0309909	0.110912	168	0.560533	Not_Significant
CNTN2	-0.0433166	0.030262	0.1542	172	0.632218	Not_Significant
CRH	0.0533464	0.0393356	0.176881	172	0.679887	Not_Significant
CRP	-0.0071246	0.034351	0.83595	170	0.993434	Not_Significant
CSF2	-0.00662229	0.0193254	0.732294	166	0.982852	Not_Significant
CST3	0.00146145	0.00726273	0.840771	170	0.993434	Not_Significant
CX3CL1	0.00562665	0.0115054	0.625451	173	0.973803	Not_Significant
CXCL1	-0.0298942	0.0334834	0.373277	169	0.823185	Not_Significant
CXCL10	-0.00770262	0.0254532	0.762566	169	0.982852	Not_Significant
CXCL8	-0.0227111	0.018143	0.212409	172	0.725732	Not_Significant
ENO2	0.00727137	0.0225537	0.747551	173	0.982852	Not_Significant
FABP3	-0.027378	0.0195251	0.162713	173	0.645602	Not_Significant
FCN2	-0.00533527	0.0207218	0.797134	172	0.982852	Not_Significant
FGF2	0.0361171	0.0332158	0.278451	173	0.771875	Not_Significant
FLT1	0.0164182	0.0180906	0.365413	174	0.823185	Not_Significant
FOLR1	0.0102121	0.0156862	0.515923	174	0.919688	Not_Significant
GDF15	-0.0338857	0.0286637	0.238932	162	0.753556	Not_Significant
GDI1	0.00179966	0.00936086	0.847778	172	0.993434	Not_Significant
GDNF	0.11399	0.0667566	0.0896239	169	0.479293	Not_Significant
GFAP	0.1365	0.0232471	2.26795e-08	173	9.29858e-07	Significant_Positive
GOT1	0.0303031	0.0154317	0.0512569	170	0.350255	Not_Significant
HBA1	0.146173	0.0662832	0.0288603	166	0.236655	Not_Significant
HTT	-0.0169706	0.0149724	0.258655	172	0.771491	Not_Significant
ICAM1	0.000141216	0.0124543	0.990967	168	0.997627	Not_Significant
IFNG	0.00032612	0.0335083	0.992247	166	0.997627	Not_Significant
IGF1R	0.00688399	0.00759926	0.366299	174	0.823185	Not_Significant
IGFBP7	-0.00843275	0.0115272	0.465467	173	0.85835	Not_Significant
IL10	0.0127068	0.021328	0.552144	170	0.921734	Not_Significant
IL12p70	-0.000138284	0.022366	0.995074	170	0.997627	Not_Significant
IL13	-0.0109963	0.0341311	0.747758	159	0.982852	Not_Significant
IL15	-0.00785352	0.0125347	0.53182	172	0.921734	Not_Significant
IL16	0.0142764	0.0144449	0.324444	170	0.809666	Not_Significant
IL17A	-0.0119616	0.0425005	0.778735	165	0.982852	Not_Significant
IL18	-0.0316094	0.0153484	0.0410118	172	0.296733	Not_Significant
IL1B	0.00766247	0.0069184	0.269708	167	0.771491	Not_Significant
IL2	-0.00041646	0.0210476	0.984237	172	0.997627	Not_Significant
IL33	0.00111755	0.018217	0.951158	171	0.997627	Not_Significant
IL4	0.0297363	0.0232494	0.202721	168	0.725732	Not_Significant
IL5	-0.0315425	0.0354437	0.374783	173	0.823185	Not_Significant
IL6	0.0267788	0.0315857	0.397771	171	0.843548	Not_Significant
IL6R	0.00552142	0.0163	0.735241	170	0.982852	Not_Significant
IL7	-0.0430819	0.0293503	0.144025	173	0.610865	Not_Significant
IL9	0.0179823	0.0317642	0.572074	173	0.938201	Not_Significant
KDR	0.0389097	0.0218191	0.0764349	166	0.470075	Not_Significant
KLK6	0.011033	0.0149495	0.461531	174	0.85835	Not_Significant
MAPT	0.0723333	0.0181555	0.000100981	173	0.00207011	Significant_Positive
MDH1	0.0022817	0.0175158	0.896514	173	0.993434	Not_Significant
MME	-0.0864092	0.0682245	0.207094	172	0.725732	Not_Significant
MSLN	0.0209143	0.0307843	0.497835	173	0.900497	Not_Significant
NEFH	-0.00321629	0.0240008	0.893559	172	0.993434	Not_Significant
NEFL	0.0701631	0.0186199	0.000228591	171	0.00401667	Significant_Positive
NGF	0.0166885	0.014596	0.254555	170	0.771491	Not_Significant
NPTX1	0.0187903	0.019463	0.335715	174	0.809666	Not_Significant
NPTX2	0.0361805	0.0137523	0.00931871	172	0.1042	Not_Significant
NPTXR	-0.0132027	0.017333	0.44731	173	0.85835	Not_Significant
NPY	-0.0216982	0.0215351	0.31518	166	0.809666	Not_Significant
NRGN	-0.016538	0.0337186	0.624456	170	0.973803	Not_Significant
Oligo-SNCA	-0.00142732	0.0354305	0.967915	168	0.997627	Not_Significant
PARK7	-7.4883e-05	0.0251364	0.997627	172	0.997627	Not_Significant
PDGFRB	-0.0247582	0.0261546	0.345197	174	0.816523	Not_Significant
PDLIM5	-0.00557026	0.0552714	0.919852	165	0.997627	Not_Significant
PGF	0.00206392	0.0128422	0.872512	174	0.993434	Not_Significant
PGK1	0.0139301	0.0183045	0.447746	169	0.85835	Not_Significant
POSTN	-0.0198149	0.0195414	0.312067	171	0.809666	Not_Significant
PRDX6	0.00865091	0.0269034	0.74819	174	0.982852	Not_Significant
pSNCA-129	-0.00275338	0.016825	0.870209	170	0.993434	Not_Significant
PSEN1	0.0314834	0.0264117	0.234985	169	0.753556	Not_Significant
pTau-181	0.107517	0.0211316	9.65381e-07	173	2.96855e-05	Significant_Positive
pTau-217	0.255201	0.0193877	1.20146e-27	174	1.47779e-25	Significant_Positive
pTau-231	0.166184	0.0198154	2.00535e-14	173	1.23329e-12	Significant_Positive
pTDP43-409	0.0125308	0.0211587	0.554539	165	0.921734	Not_Significant
PTN	0.0193724	0.0240792	0.42225	171	0.85835	Not_Significant
REST	0.0179929	0.0182991	0.326914	171	0.809666	Not_Significant
RUVBL2	0.00695252	0.0226157	0.758911	171	0.982852	Not_Significant
S100A12	0.128423	0.0500175	0.0111235	172	0.114015	Not_Significant
S100B	-0.0107654	0.0198872	0.589015	171	0.953274	Not_Significant
SAA1	-0.003156	0.0564364	0.955473	170	0.997627	Not_Significant
SFRP1	-0.0395852	0.0367016	0.282393	167	0.771875	Not_Significant
SFTPD	0.0706307	0.0284172	0.0139156	174	0.131663	Not_Significant
SLIT2	0.010459	0.0131718	0.428317	170	0.85835	Not_Significant
SMOC1	0.0380324	0.0342535	0.268526	166	0.771491	Not_Significant
SNAP25	0.052673	0.0117596	1.4144e-05	167	0.000347941	Significant_Positive
SNCA	-0.00281048	0.0173734	0.871683	173	0.993434	Not_Significant
SNCB	-0.0168411	0.0191905	0.381482	167	0.823197	Not_Significant
SOD1	-0.0307459	0.0159314	0.0553245	172	0.358153	Not_Significant
SQSTM1	-0.0434756	0.0206308	0.0366117	170	0.281452	Not_Significant
TAFA5	0.0103796	0.0260034	0.690295	169	0.982852	Not_Significant
TARDBP	-0.00968739	0.0187445	0.605975	172	0.967987	Not_Significant
TEK	0.0175166	0.0116456	0.134436	173	0.59056	Not_Significant
TIMP3	0.0120251	0.0437935	0.78398	170	0.982852	Not_Significant
TNF	-0.00463095	0.0152157	0.76124	172	0.982852	Not_Significant
TREM1	-0.000683698	0.0188489	0.971108	173	0.997627	Not_Significant
TREM2	0.00572967	0.0224727	0.799067	173	0.982852	Not_Significant
UCHL1	0.0110328	0.018533	0.552439	174	0.921734	Not_Significant
VCAM1	0.0275	0.012057	0.0238152	174	0.209234	Not_Significant
VEGFA	0.000515457	0.0143653	0.971419	172	0.997627	Not_Significant
VEGFD	0.0402597	0.0263986	0.129168	170	0.588433	Not_Significant
VGF	0.0890017	0.0692794	0.200762	166	0.725732	Not_Significant
VSNL1	0.00365036	0.0135423	0.787844	170	0.982852	Not_Significant
YWHAZ	0.00527424	0.0361625	0.884217	173	0.993434	Not_Significant

## Sheet: Table S6
ST6: Tau PET estimates
Protein	Estimate	SE	P_Value	Sample_Size	FDR	Significant
ACHE	0.18653	0.0845181	0.028308	235	0.218116	Not_Significant
AGRN	-0.062219	0.0436979	0.155801	244	0.491373	Not_Significant
ANXA5	-0.242898	0.158027	0.125622	241	0.482567	Not_Significant
APOE	0.0874967	0.0905826	0.335075	240	0.675492	Not_Significant
ARSA	-0.0623569	0.0999575	0.533334	244	0.809178	Not_Significant
Aβ38	-0.0795859	0.0896728	0.375698	244	0.679572	Not_Significant
Aβ40	-0.117488	0.0654857	0.0740712	243	0.39612	Not_Significant
Aβ42	-0.207556	0.0914555	0.0241351	244	0.213881	Not_Significant
BACE1	0.0889277	0.054865	0.10638	243	0.439927	Not_Significant
BASP1	-0.437665	0.257565	0.0906504	232	0.437753	Not_Significant
BDNF	-0.550108	0.233829	0.0194573	244	0.213881	Not_Significant
CALB2	-0.0281661	0.0816275	0.730362	240	0.881827	Not_Significant
CCL11	-0.0270015	0.0748325	0.718552	242	0.881827	Not_Significant
CCL13	-0.0552484	0.0899029	0.539452	243	0.809178	Not_Significant
CCL17	-0.0950121	0.17356	0.584598	243	0.842039	Not_Significant
CCL2	-0.111027	0.0765736	0.14842	239	0.491373	Not_Significant
CCL22	0.0752317	0.0803991	0.350377	240	0.675492	Not_Significant
CCL26	-0.102631	0.0918892	0.265174	242	0.675492	Not_Significant
CCL3	-0.0151754	0.0667965	0.820476	239	0.909176	Not_Significant
CCL4	-0.122349	0.113593	0.282596	231	0.675492	Not_Significant
CD40LG	0.0837663	0.103116	0.41742	239	0.703325	Not_Significant
CD63	0.00942946	0.0668909	0.888015	243	0.937583	Not_Significant
CHI3L1	-0.0210247	0.158714	0.894725	244	0.937583	Not_Significant
CHIT1	0.145609	0.138034	0.292597	234	0.675492	Not_Significant
CNTN2	0.075813	0.140032	0.588743	242	0.842039	Not_Significant
CRH	-0.0632488	0.161289	0.695305	242	0.881827	Not_Significant
CRP	-0.304467	0.156023	0.0522107	238	0.321096	Not_Significant
CSF2	-0.0354233	0.0649798	0.58618	237	0.842039	Not_Significant
CST3	-0.0466868	0.0310946	0.134595	239	0.482567	Not_Significant
CX3CL1	-0.0666621	0.0511495	0.193745	243	0.566408	Not_Significant
CXCL1	-0.134766	0.146998	0.360217	236	0.675492	Not_Significant
CXCL10	0.0190626	0.104963	0.856043	241	0.928949	Not_Significant
CXCL8	-0.103623	0.0727412	0.155623	240	0.491373	Not_Significant
ENO2	0.0398042	0.101697	0.695852	243	0.881827	Not_Significant
FABP3	-0.0123148	0.0743177	0.86853	244	0.928949	Not_Significant
FCN2	-0.0231144	0.0933602	0.804676	238	0.899774	Not_Significant
FGF2	0.114668	0.158501	0.470113	243	0.760841	Not_Significant
FLT1	-0.0144619	0.0845454	0.864326	244	0.928949	Not_Significant
FOLR1	-0.0529713	0.0650893	0.416565	242	0.703325	Not_Significant
GDF15	0.0722833	0.111256	0.516551	230	0.804251	Not_Significant
GDI1	-0.0266778	0.0393844	0.498835	242	0.786624	Not_Significant
GDNF	-0.472609	0.292342	0.107299	241	0.439927	Not_Significant
GFAP	0.737496	0.0953259	2.92525e-13	243	1.19935e-11	Significant_Positive
GOT1	0.146248	0.0663078	0.0283728	243	0.218116	Not_Significant
HBA1	0.54528	0.336268	0.106304	230	0.439927	Not_Significant
HTT	0.00485893	0.0655824	0.941003	241	0.954544	Not_Significant
ICAM1	-0.0158263	0.0575674	0.783625	237	0.899774	Not_Significant
IFNG	-0.0763164	0.14381	0.596162	234	0.842849	Not_Significant
IGF1R	0.00284403	0.0317974	0.928806	244	0.954544	Not_Significant
IGFBP7	-0.0126485	0.0414496	0.760516	243	0.891463	Not_Significant
IL10	-0.0637857	0.0820103	0.43749	239	0.727179	Not_Significant
IL12p70	0.0461228	0.112956	0.683409	239	0.881827	Not_Significant
IL13	-0.336237	0.155809	0.0320001	228	0.23153	Not_Significant
IL15	-0.116398	0.0502192	0.0213167	242	0.213881	Not_Significant
IL16	-0.0711889	0.0663515	0.284428	238	0.675492	Not_Significant
IL17A	-0.117232	0.18781	0.533139	226	0.809178	Not_Significant
IL18	-0.128556	0.0622293	0.0399348	242	0.258525	Not_Significant
IL1B	-0.0283329	0.0309125	0.360341	235	0.675492	Not_Significant
IL2	-0.103271	0.0842621	0.221585	240	0.61943	Not_Significant
IL33	-0.0196781	0.0667052	0.768253	242	0.891463	Not_Significant
IL4	-0.186859	0.103751	0.073001	237	0.39612	Not_Significant
IL5	-0.188196	0.162101	0.246838	239	0.674692	Not_Significant
IL6	-0.215314	0.130066	0.0991805	240	0.439927	Not_Significant
IL6R	-0.00812451	0.064242	0.89947	242	0.937583	Not_Significant
IL7	-0.289386	0.127702	0.0243442	244	0.213881	Not_Significant
IL9	-0.305871	0.124478	0.0147215	242	0.181075	Not_Significant
KDR	-0.037677	0.102857	0.714482	231	0.881827	Not_Significant
KLK6	-0.060861	0.0607113	0.317137	244	0.675492	Not_Significant
MAPT	0.298324	0.07316	6.2291e-05	241	0.00153236	Significant_Positive
MDH1	-0.0366838	0.0889548	0.680427	244	0.881827	Not_Significant
MME	0.25937	0.239023	0.278983	240	0.675492	Not_Significant
MSLN	-0.241007	0.142263	0.0915563	244	0.437753	Not_Significant
NEFH	0.651339	0.436606	0.13707	244	0.482567	Not_Significant
NEFL	0.309116	0.0790596	0.000120581	243	0.00211879	Significant_Positive
NGF	-0.0530379	0.0617785	0.391474	243	0.687877	Not_Significant
NPTX1	-0.0783324	0.0840348	0.352219	241	0.675492	Not_Significant
NPTX2	0.0946065	0.0640955	0.141265	243	0.482654	Not_Significant
NPTXR	-0.215624	0.0796426	0.00727728	242	0.111888	Not_Significant
NPY	-0.0259405	0.0827769	0.754275	238	0.891463	Not_Significant
NRGN	0.147642	0.161803	0.362459	239	0.675492	Not_Significant
Oligo-SNCA	0.0116359	0.155138	0.940278	232	0.954544	Not_Significant
PARK7	-0.0325622	0.110351	0.768192	243	0.891463	Not_Significant
PDGFRB	0.163425	0.11731	0.164887	244	0.507027	Not_Significant
PDLIM5	-0.211265	0.276815	0.446158	227	0.731699	Not_Significant
PGF	0.0837214	0.0561539	0.137316	242	0.482567	Not_Significant
PGK1	0.0398804	0.0806728	0.621524	240	0.868722	Not_Significant
POSTN	0.0930102	0.0919543	0.312813	244	0.675492	Not_Significant
PRDX6	-0.11472	0.116928	0.327539	242	0.675492	Not_Significant
pSNCA-129	-0.0143196	0.0779688	0.85444	241	0.928949	Not_Significant
PSEN1	-0.0803313	0.117921	0.496409	237	0.786624	Not_Significant
pTau-181	0.558942	0.0884	1.28039e-09	241	3.9372e-08	Significant_Positive
pTau-217	1.24699	0.10255	8.82882e-27	244	1.08594e-24	Significant_Positive
pTau-231	0.818822	0.0877205	7.9725e-18	241	4.90309e-16	Significant_Positive
pTDP43-409	-0.0770758	0.0930324	0.408256	236	0.703325	Not_Significant
PTN	0.0482796	0.103415	0.641033	243	0.881827	Not_Significant
REST	-0.0805788	0.0795041	0.311855	241	0.675492	Not_Significant
RUVBL2	0.0349737	0.0912388	0.701826	243	0.881827	Not_Significant
S100A12	0.00246958	0.209017	0.990583	244	0.990583	Not_Significant
S100B	-0.0710272	0.0821165	0.387948	240	0.687877	Not_Significant
SAA1	-0.0862195	0.19898	0.665192	239	0.881827	Not_Significant
SFRP1	0.0430922	0.163976	0.792951	229	0.899774	Not_Significant
SFTPD	0.12327	0.131352	0.348956	243	0.675492	Not_Significant
SLIT2	0.0189696	0.0551692	0.731271	241	0.881827	Not_Significant
SMOC1	-0.144728	0.149439	0.333822	236	0.675492	Not_Significant
SNAP25	0.137832	0.0519574	0.00853431	238	0.116636	Not_Significant
SNCA	-0.0685278	0.0730197	0.348947	244	0.675492	Not_Significant
SNCB	0.0768016	0.0795821	0.335523	237	0.675492	Not_Significant
SOD1	-0.143804	0.0788107	0.0693188	241	0.39612	Not_Significant
SQSTM1	-0.103057	0.0752664	0.172253	238	0.516759	Not_Significant
TAFA5	-0.115278	0.089305	0.198013	244	0.566408	Not_Significant
TARDBP	-0.118912	0.0704037	0.0925331	243	0.437753	Not_Significant
TEK	-0.0471174	0.0526313	0.371566	244	0.679572	Not_Significant
TIMP3	-0.0782254	0.206523	0.705201	239	0.881827	Not_Significant
TNF	0.0196892	0.0499843	0.694004	243	0.881827	Not_Significant
TREM1	-0.0697651	0.0675271	0.302586	244	0.675492	Not_Significant
TREM2	-0.0352502	0.0835834	0.673601	242	0.881827	Not_Significant
UCHL1	0.0504251	0.0835863	0.546903	244	0.810471	Not_Significant
VCAM1	0.0646526	0.0570914	0.258589	244	0.675492	Not_Significant
VEGFA	-0.105785	0.0503696	0.0367937	238	0.251423	Not_Significant
VEGFD	0.0223365	0.0891933	0.802474	242	0.899774	Not_Significant
VGF	0.475211	0.298502	0.112761	236	0.447406	Not_Significant
VSNL1	0.20741	0.0530169	0.000120345	237	0.00211879	Significant_Positive
YWHAZ	-0.00908038	0.135898	0.946783	242	0.954544	Not_Significant

## Sheet: Table S7
ST7: CSF AB42/AB40 ratio estimates
Protein	Estimate	SE	P_Value	Sample_Size	FDR	Significant
ACHE	-0.145394	0.0402728	0.00033811	486	0.00415875	Significant_Negative
AGRN	0.000956452	0.0278907	0.972657	503	0.989651	Not_Significant
ANXA5	-0.0358872	0.0882688	0.684503	496	0.915799	Not_Significant
APOE	-0.0787939	0.0472965	0.0963586	498	0.370378	Not_Significant
ARSA	0.060303	0.0554047	0.276945	500	0.640491	Not_Significant
Aβ38	0.0420061	0.053221	0.430327	502	0.739116	Not_Significant
Aβ40	0.0551213	0.0485399	0.256677	503	0.60714	Not_Significant
Aβ42	0.323951	0.0529262	1.90091e-09	499	3.34017e-08	Significant_Positive
BACE1	-0.129782	0.0282529	5.53176e-06	502	8.50508e-05	Significant_Negative
BASP1	-0.0344714	0.127333	0.786725	482	0.955689	Not_Significant
BDNF	0.299011	0.129836	0.0216902	504	0.140415	Not_Significant
CALB2	-0.0437062	0.0460767	0.343312	499	0.702939	Not_Significant
CCL11	-0.00473067	0.0398919	0.905651	499	0.989651	Not_Significant
CCL13	0.0502436	0.0481513	0.297251	498	0.656649	Not_Significant
CCL17	0.114823	0.095527	0.229942	499	0.554566	Not_Significant
CCL2	0.0731855	0.043139	0.0904244	497	0.362655	Not_Significant
CCL22	0.0515764	0.0424741	0.225219	494	0.554039	Not_Significant
CCL26	0.0616106	0.0491415	0.210539	493	0.538053	Not_Significant
CCL3	0.110188	0.0440043	0.0126062	491	0.103371	Not_Significant
CCL4	0.0865375	0.0627461	0.1685	475	0.510046	Not_Significant
CD40LG	-0.0358217	0.053815	0.505958	486	0.787757	Not_Significant
CD63	0.000517177	0.0398505	0.989651	497	0.989651	Not_Significant
CHI3L1	0.0536186	0.083276	0.51996	502	0.793111	Not_Significant
CHIT1	-0.139309	0.07455	0.0622873	479	0.306454	Not_Significant
CNTN2	0.0651216	0.0723918	0.368787	499	0.723749	Not_Significant
CRH	-0.0724163	0.0818258	0.376585	499	0.723749	Not_Significant
CRP	0.240519	0.0816663	0.00338154	496	0.0323822	Significant_Positive
CSF2	0.0573907	0.0440817	0.193572	484	0.538053	Not_Significant
CST3	0.00439566	0.0180849	0.808062	497	0.955689	Not_Significant
CX3CL1	0.00041245	0.0297933	0.98896	502	0.989651	Not_Significant
CXCL1	0.227258	0.0812415	0.00535918	488	0.0470842	Significant_Positive
CXCL10	0.0237061	0.0616928	0.700952	496	0.917203	Not_Significant
CXCL8	0.120341	0.0409137	0.00342251	496	0.0323822	Significant_Positive
ENO2	0.0540219	0.0649674	0.406081	499	0.739116	Not_Significant
FABP3	0.102483	0.0414273	0.0137003	504	0.105321	Not_Significant
FCN2	0.0372272	0.0495401	0.452736	499	0.739116	Not_Significant
FGF2	-0.111884	0.0822121	0.174162	498	0.510046	Not_Significant
FLT1	0.00155965	0.045088	0.97242	504	0.989651	Not_Significant
FOLR1	-0.0798132	0.0377749	0.0351138	500	0.205666	Not_Significant
GDF15	0.0266634	0.0639605	0.676961	479	0.915799	Not_Significant
GDI1	-0.0154378	0.022846	0.499526	500	0.787715	Not_Significant
GDNF	-0.0114029	0.151772	0.940141	489	0.989651	Not_Significant
GFAP	-0.586789	0.0501473	4.24818e-28	502	1.74175e-26	Significant_Negative
GOT1	-0.0378173	0.0367754	0.304301	497	0.656649	Not_Significant
HBA1	0.0633703	0.160292	0.692767	482	0.91624	Not_Significant
HTT	0.00134121	0.036558	0.970749	496	0.989651	Not_Significant
ICAM1	0.031115	0.0331647	0.348612	489	0.702939	Not_Significant
IFNG	0.0641672	0.0791227	0.417778	485	0.739116	Not_Significant
IGF1R	-0.00285143	0.0180375	0.874455	502	0.979157	Not_Significant
IGFBP7	-0.00159726	0.0239765	0.946913	500	0.989651	Not_Significant
IL10	-0.0096423	0.0523528	0.85395	492	0.978182	Not_Significant
IL12p70	-0.0731777	0.0582717	0.209789	494	0.538053	Not_Significant
IL13	0.167863	0.080323	0.0371619	482	0.207769	Not_Significant
IL15	0.0329797	0.0305697	0.281191	496	0.640491	Not_Significant
IL16	0.0374883	0.036388	0.303418	485	0.656649	Not_Significant
IL17A	-0.181068	0.0967827	0.0619924	470	0.306454	Not_Significant
IL18	0.0426241	0.0342086	0.213358	496	0.538053	Not_Significant
IL1B	0.0163559	0.0170322	0.337395	483	0.702939	Not_Significant
IL2	0.0431275	0.0502295	0.390976	496	0.728637	Not_Significant
IL33	-0.010066	0.0383031	0.792815	499	0.955689	Not_Significant
IL4	0.0319001	0.0559604	0.56891	489	0.823247	Not_Significant
IL5	0.20975	0.0856174	0.0146418	494	0.105938	Not_Significant
IL6	0.064824	0.0745824	0.385183	498	0.728637	Not_Significant
IL6R	-0.0275875	0.0365639	0.450911	497	0.739116	Not_Significant
IL7	0.165174	0.0709126	0.0202443	504	0.138336	Not_Significant
IL9	0.103475	0.0737496	0.161229	499	0.508492	Not_Significant
KDR	-0.00361977	0.0538281	0.946414	475	0.989651	Not_Significant
KLK6	0.00634665	0.03568	0.858892	504	0.978182	Not_Significant
MAPT	-0.284981	0.0420733	3.59218e-11	499	7.36397e-10	Significant_Negative
MDH1	0.0836544	0.048565	0.0856031	498	0.362655	Not_Significant
MME	0.50123	0.153757	0.00119176	498	0.013326	Significant_Positive
MSLN	0.0165501	0.0790561	0.834264	503	0.968061	Not_Significant
NEFH	-0.112773	0.0907051	0.214346	501	0.538053	Not_Significant
NEFL	-0.19708	0.0442489	1.04376e-05	500	0.000142648	Significant_Negative
NGF	-0.0126055	0.0344983	0.714973	500	0.925702	Not_Significant
NPTX1	-0.0132686	0.0460827	0.77352	502	0.955689	Not_Significant
NPTX2	-0.042019	0.0329872	0.203335	499	0.538053	Not_Significant
NPTXR	0.0885603	0.0416277	0.0338784	500	0.205666	Not_Significant
NPY	0.0300651	0.0515972	0.560377	485	0.820842	Not_Significant
NRGN	-0.0625727	0.0840014	0.45669	495	0.739116	Not_Significant
Oligo-SNCA	0.0286603	0.0846722	0.735148	480	0.932198	Not_Significant
PARK7	0.0447086	0.0636829	0.48298	497	0.771514	Not_Significant
PDGFRB	-0.0865916	0.061048	0.156694	504	0.507193	Not_Significant
PDLIM5	-0.0938755	0.146614	0.522293	479	0.793111	Not_Significant
PGF	-0.00925722	0.0318473	0.771421	501	0.955689	Not_Significant
PGK1	0.0092859	0.0379585	0.806845	488	0.955689	Not_Significant
POSTN	-0.020289	0.047233	0.667711	496	0.915799	Not_Significant
PRDX6	-0.00117184	0.0619346	0.984912	501	0.989651	Not_Significant
pSNCA-129	0.0315721	0.0421121	0.453788	493	0.739116	Not_Significant
PSEN1	0.0223606	0.064911	0.730638	479	0.932198	Not_Significant
pTau-181	-0.430462	0.048647	1.58149e-17	500	4.86308e-16	Significant_Negative
pTau-217	-1.03382	0.0560482	2.76137e-58	504	3.39649e-56	Significant_Negative
pTau-231	-0.654218	0.0463675	3.17223e-38	500	1.95092e-36	Significant_Negative
pTDP43-409	-0.0673561	0.0521077	0.196771	478	0.538053	Not_Significant
PTN	-0.101545	0.056098	0.0708841	498	0.335336	Not_Significant
REST	-0.0105289	0.0432765	0.807882	489	0.955689	Not_Significant
RUVBL2	-0.0863517	0.0538561	0.109493	498	0.405456	Not_Significant
S100A12	-0.102753	0.116009	0.376191	502	0.723749	Not_Significant
S100B	0.0324101	0.0422649	0.443553	493	0.739116	Not_Significant
SAA1	0.0536231	0.132106	0.684988	496	0.915799	Not_Significant
SFRP1	-0.116112	0.0845208	0.170179	468	0.510046	Not_Significant
SFTPD	-0.126398	0.0706029	0.0740216	502	0.33721	Not_Significant
SLIT2	0.0481719	0.0319452	0.132206	499	0.451705	Not_Significant
SMOC1	-0.0829495	0.0847047	0.327933	488	0.695445	Not_Significant
SNAP25	-0.214041	0.0255361	5.68122e-16	491	1.39758e-14	Significant_Negative
SNCA	-0.00451196	0.0410747	0.912575	503	0.989651	Not_Significant
SNCB	0.0026264	0.0431147	0.951451	489	0.989651	Not_Significant
SOD1	0.00650444	0.0415504	0.875669	498	0.979157	Not_Significant
SQSTM1	0.0860742	0.0445623	0.0539955	493	0.288759	Not_Significant
TAFA5	0.0083247	0.0610399	0.891575	502	0.987962	Not_Significant
TARDBP	-0.0258154	0.044327	0.560575	495	0.820842	Not_Significant
TEK	0.0455915	0.0295681	0.123731	503	0.434825	Not_Significant
TIMP3	0.0883674	0.110092	0.422554	496	0.739116	Not_Significant
TNF	0.059172	0.0349847	0.091401	497	0.362655	Not_Significant
TREM1	0.0179972	0.0412418	0.662751	500	0.915799	Not_Significant
TREM2	-0.0401294	0.0516093	0.437203	497	0.739116	Not_Significant
UCHL1	-0.0718164	0.045118	0.112077	503	0.405456	Not_Significant
VCAM1	-0.0569204	0.032227	0.0779709	503	0.342515	Not_Significant
VEGFA	0.0129217	0.0304453	0.671444	498	0.915799	Not_Significant
VEGFD	0.034045	0.0571659	0.551752	497	0.820842	Not_Significant
VGF	-0.0359334	0.157798	0.819963	489	0.960528	Not_Significant
VSNL1	-0.0464415	0.0322124	0.150023	493	0.498724	Not_Significant
YWHAZ	0.0356896	0.0800305	0.655828	502	0.915799	Not_Significant

## Sheet: Table S8
ST8: CDR estimates
Protein	Estimate	SE	P_Value	Sample_Size	FDR	Significant
ACHE	0.0558169	0.00623973	7.56802e-19	2251	1.0343e-17	Significant_Positive
AGRN	-0.0123288	0.00393551	0.00175296	2394	0.00392025	Significant_Negative
ANXA5	0.00621916	0.00765083	0.416371	2405	0.480047	Not_Significant
APOE	0.0174177	0.00618146	0.00487646	2383	0.00967426	Significant_Positive
ARSA	0.0640161	0.0105924	1.74399e-09	2390	9.32654e-09	Significant_Positive
Aβ38	-0.0757467	0.00890767	3.20309e-17	2379	3.28317e-16	Significant_Negative
Aβ40	-0.0493884	0.00769001	1.61476e-10	2382	9.93077e-10	Significant_Negative
Aβ42	-0.127209	0.00930503	5.61701e-41	2325	1.72723e-39	Significant_Negative
BACE1	0.00531951	0.00400976	0.184754	2401	0.241753	Not_Significant
BASP1	0.000138463	0.0156148	0.992926	2317	0.997343	Not_Significant
BDNF	-0.175965	0.0216034	5.99939e-16	2424	5.67634e-15	Significant_Negative
CALB2	-0.00299278	0.00564359	0.595955	2398	0.636638	Not_Significant
CCL11	-0.00793405	0.00595514	0.182889	2368	0.241753	Not_Significant
CCL13	-0.0108657	0.00690085	0.115494	2385	0.163284	Not_Significant
CCL17	-0.0422405	0.0126545	0.000856908	2381	0.00206666	Significant_Negative
CCL2	0.0275686	0.00620314	9.22432e-06	2373	3.03622e-05	Significant_Positive
CCL22	-0.0128535	0.00581143	0.0270781	2372	0.0456247	Significant_Negative
CCL26	0.0118774	0.00750035	0.113425	2328	0.162224	Not_Significant
CCL3	-0.00767507	0.00560268	0.170853	2343	0.230456	Not_Significant
CCL4	-0.0239243	0.00821859	0.00363746	2305	0.00771392	Significant_Negative
CD40LG	0.00195602	0.00724394	0.787167	2364	0.806846	Not_Significant
CD63	-0.0160352	0.00558822	0.00414813	2380	0.00864779	Significant_Negative
CHI3L1	0.00780567	0.0108948	0.473777	2399	0.530335	Not_Significant
CHIT1	0.0404466	0.0101696	7.1875e-05	2314	0.000196458	Significant_Positive
CNTN2	-0.039287	0.00965857	4.90439e-05	2396	0.0001371	Significant_Negative
CRH	0.0260123	0.0110976	0.0191626	2394	0.0331971	Significant_Positive
CRP	-0.0281904	0.00995523	0.00466871	2389	0.00941395	Significant_Negative
CSF2	-0.0265083	0.00615708	1.73575e-05	2355	5.33742e-05	Significant_Negative
CST3	-0.0106336	0.00232659	5.11926e-06	2350	1.90029e-05	Significant_Negative
CX3CL1	0.00213605	0.00407732	0.600406	2397	0.636638	Not_Significant
CXCL1	-0.0392413	0.0105676	0.00020932	2335	0.000536382	Significant_Negative
CXCL10	-0.0333234	0.00784741	2.25586e-05	2378	6.60645e-05	Significant_Negative
CXCL8	-0.000584755	0.00557753	0.916511	2361	0.93166	Not_Significant
ENO2	-0.0249114	0.0125192	0.0467248	2305	0.0730198	Not_Significant
FABP3	-0.0308741	0.00575395	8.83893e-08	2396	4.34876e-07	Significant_Negative
FCN2	-0.00793488	0.0066465	0.232659	2373	0.298095	Not_Significant
FGF2	-0.00889422	0.0108355	0.411818	2405	0.480047	Not_Significant
FLT1	-0.0401442	0.00658135	1.23739e-09	2377	6.91812e-09	Significant_Negative
FOLR1	-0.0149899	0.00526591	0.0044566	2399	0.00913603	Significant_Negative
GDF15	-0.0275833	0.00835518	0.000976883	2318	0.0022671	Significant_Negative
GDI1	-0.00930832	0.00332025	0.00509621	2384	0.00979992	Significant_Negative
GDNF	0.0224348	0.0201999	0.266837	2359	0.334908	Not_Significant
GFAP	0.130798	0.0075258	7.84975e-64	2413	4.8276e-62	Significant_Positive
GOT1	-0.0245409	0.0054305	6.51479e-06	2386	2.22589e-05	Significant_Negative
HBA1	-0.143872	0.023161	6.18971e-10	2323	3.6254e-09	Significant_Negative
HTT	-0.0295004	0.00688592	1.90685e-05	2398	5.72056e-05	Significant_Negative
ICAM1	-0.010537	0.00449175	0.0190661	2344	0.0331971	Significant_Negative
IFNG	-0.0305844	0.00999087	0.00222927	2350	0.00489642	Significant_Negative
IGF1R	-0.00233718	0.00262941	0.374168	2397	0.442525	Not_Significant
IGFBP7	-0.013928	0.00364383	0.00013557	2388	0.000362503	Significant_Negative
IL10	-0.00888226	0.00674298	0.18788	2355	0.243255	Not_Significant
IL12p70	-0.0146519	0.00819628	0.0739641	2375	0.108305	Not_Significant
IL13	-0.0443545	0.0106446	3.2025e-05	2304	9.16065e-05	Significant_Negative
IL15	-0.0196456	0.00415461	2.39237e-06	2388	9.4923e-06	Significant_Negative
IL16	-0.0156636	0.00470426	0.000882806	2376	0.00208817	Significant_Negative
IL17A	0.0294077	0.0122055	0.0160585	2292	0.028626	Significant_Positive
IL18	0.0111129	0.00615643	0.0711887	2379	0.105497	Not_Significant
IL1B	-0.00212567	0.00222578	0.339665	2327	0.413651	Not_Significant
IL2	-0.0170385	0.00667099	0.0107078	2380	0.0199554	Significant_Negative
IL33	-0.00997469	0.00531801	0.0608272	2373	0.0923673	Not_Significant
IL4	-0.0149066	0.00732679	0.0420087	2377	0.0671049	Not_Significant
IL5	-0.0473208	0.0109618	1.64736e-05	2385	5.19553e-05	Significant_Negative
IL6	-0.00602735	0.00873748	0.490371	2368	0.538533	Not_Significant
IL6R	-0.0274351	0.00522185	1.62242e-07	2368	7.67528e-07	Significant_Negative
IL7	-0.0733164	0.00958686	2.93692e-14	2419	2.5803e-13	Significant_Negative
IL9	-0.0160207	0.0099926	0.109011	2389	0.157745	Not_Significant
KDR	-0.0138915	0.00681761	0.041705	2307	0.0671049	Not_Significant
KLK6	-0.0420593	0.00556066	5.54324e-14	2406	4.26137e-13	Significant_Negative
MAPT	0.032166	0.00635412	4.45906e-07	2401	1.9588e-06	Significant_Positive
MDH1	-0.0561186	0.00805944	4.28764e-12	2391	3.10224e-11	Significant_Negative
MME	-0.0746941	0.0205233	0.000278959	2406	0.000700243	Significant_Negative
MSLN	-0.00979976	0.0104613	0.348973	2414	0.42082	Not_Significant
NEFH	0.0614079	0.0287519	0.0327974	2411	0.0545146	Not_Significant
NEFL	0.0791561	0.00662323	5.1596e-32	2388	1.05772e-30	Significant_Positive
NGF	-0.00565306	0.00479192	0.238235	2380	0.302091	Not_Significant
NPTX1	-0.0112949	0.00616169	0.0669141	2388	0.100371	Not_Significant
NPTX2	0.00963707	0.00484704	0.0468989	2399	0.0730198	Not_Significant
NPTXR	-0.0671254	0.00548457	1.89782e-33	2391	4.66863e-32	Significant_Negative
NPY	-0.0366814	0.00825848	9.38021e-06	2152	3.03622e-05	Significant_Negative
NRGN	-0.058977	0.0130389	6.39151e-06	2383	2.22589e-05	Significant_Negative
Oligo-SNCA	-0.0439826	0.013702	0.00134567	2336	0.00306513	Significant_Negative
PARK7	-0.00726293	0.0104343	0.48646	2357	0.538533	Not_Significant
PDGFRB	-0.0112765	0.00826106	0.172373	2417	0.230456	Not_Significant
PDLIM5	-0.00500095	0.0154979	0.746961	2330	0.772069	Not_Significant
PGF	-0.010413	0.00426397	0.0146745	2397	0.0265436	Significant_Negative
PGK1	-0.0431088	0.00866856	7.06348e-07	2381	2.89603e-06	Significant_Negative
POSTN	-0.0270157	0.00723833	0.00019427	2335	0.000508409	Significant_Negative
PRDX6	0.00314433	0.00962288	0.743881	2410	0.772069	Not_Significant
pSNCA-129	-0.0473884	0.00858725	3.78993e-08	2388	1.94234e-07	Significant_Negative
PSEN1	-0.0343389	0.00752217	5.25285e-06	2347	1.90029e-05	Significant_Negative
pTau-181	0.0661938	0.00737991	5.85933e-19	2405	1.00081e-17	Significant_Positive
pTau-217	0.194397	0.00874508	9.66031e-100	2417	1.18822e-97	Significant_Positive
pTau-231	0.116009	0.00777233	3.04042e-48	2407	1.24657e-46	Significant_Positive
pTDP43-409	0.00381934	0.0064988	0.556791	2342	0.600748	Not_Significant
PTN	0.00980387	0.00680995	0.150101	2385	0.205138	Not_Significant
REST	-0.0197884	0.00560751	0.000425246	2371	0.00104611	Significant_Negative
RUVBL2	-0.00310562	0.0082216	0.705658	2407	0.741846	Not_Significant
S100A12	-3.99294e-05	0.0119895	0.997343	2420	0.997343	Not_Significant
S100B	-0.00836641	0.00570998	0.142993	2364	0.199865	Not_Significant
SAA1	0.0087783	0.0122663	0.474283	2380	0.530335	Not_Significant
SFRP1	-0.00876531	0.0116777	0.452973	2224	0.515886	Not_Significant
SFTPD	0.00643734	0.00974881	0.509111	2402	0.554165	Not_Significant
SLIT2	-0.0104751	0.00461397	0.02328	2339	0.03977	Significant_Negative
SMOC1	-0.00900562	0.011108	0.417602	2332	0.480047	Not_Significant
SNAP25	0.0070926	0.00363227	0.0509774	2374	0.0783777	Not_Significant
SNCA	-0.0573693	0.00836439	8.80566e-12	2406	6.0172e-11	Significant_Negative
SNCB	0.0116756	0.00564758	0.0388097	2335	0.063648	Not_Significant
SOD1	-0.0683951	0.0079814	1.84638e-17	2374	2.06459e-16	Significant_Negative
SQSTM1	-0.0301102	0.00649595	3.76215e-06	2339	1.44608e-05	Significant_Negative
TAFA5	-0.0476019	0.00924111	2.80374e-07	2369	1.27726e-06	Significant_Negative
TARDBP	-0.0614884	0.00806828	3.59972e-14	2405	2.95177e-13	Significant_Negative
TEK	-0.0119968	0.00427955	0.00509915	2398	0.00979992	Significant_Negative
TIMP3	-0.0994982	0.0149911	3.94524e-11	2390	2.55402e-10	Significant_Negative
TNF	-0.013974	0.0047551	0.00332728	2380	0.00717992	Significant_Negative
TREM1	-0.0155004	0.00560685	0.00574385	2399	0.0108691	Significant_Negative
TREM2	0.0175446	0.00690128	0.0110772	2412	0.0203358	Significant_Positive
UCHL1	-0.00632124	0.00590571	0.284564	2416	0.350014	Not_Significant
VCAM1	0.00618893	0.00429574	0.149796	2407	0.205138	Not_Significant
VEGFA	-0.0409966	0.00460102	9.89099e-19	2384	1.21659e-17	Significant_Negative
VEGFD	0.0807832	0.0090151	6.50931e-19	2301	1.00081e-17	Significant_Positive
VGF	-0.0186465	0.0202532	0.357319	2344	0.426702	Not_Significant
VSNL1	0.00483223	0.00447355	0.280173	2379	0.348093	Not_Significant
YWHAZ	0.0551879	0.011018	5.87375e-07	2400	2.49128e-06	Significant_Positive

## Sheet: Table S9
ST9: Concordance Rate for Each Threshold
Amyloid-PET vs p-tau217
Value	Lower threshold	Upper threshold	Intermediate threshold (Youden Index)	Intermediate range threshold
Cutoff	3.60671	3.80229	3.66155	[3.607, 3.802]
Concordance %	0.8339	0.872	0.9031	0.9359
Tauopathy vs p-tau217
Cutoff	3.64782	3.96766	3.82462	[3.648, 3.968]
Concordance %	0.7611	0.8866	0.8866	0.9301

## Sheet: Table S10
ST10: Plasma pTau217 as a marker of brain amyloidosis
Target	Adjustment	AUC	PPV	NPV	Sensitivity	Specificity	Accuracy
Amyloid-PET	Sex+Age	0.953	0.82	0.952	0.901	0.909	0.907
	None	0.951	0.8	0.962	0.923	0.894	0.903
Tau PET	Sex+Age	0.93	0.608	0.979	0.886	0.904	0.902
	None	0.928	0.574	0.979	0.886	0.89	0.889

[truncated: 11 more sheets: Table S11, Table S12, Table S13, Table S14, Table S15, Table S16, Table S17, Table S18, Table S19, Table S20, Table S21]
